# Supplementary material
Source: Springer Nature journal article supplement (https://www.springermedizin.de/resource/supplementary/12888_2011_872_MOESM1_ESM.pdf/9478408)

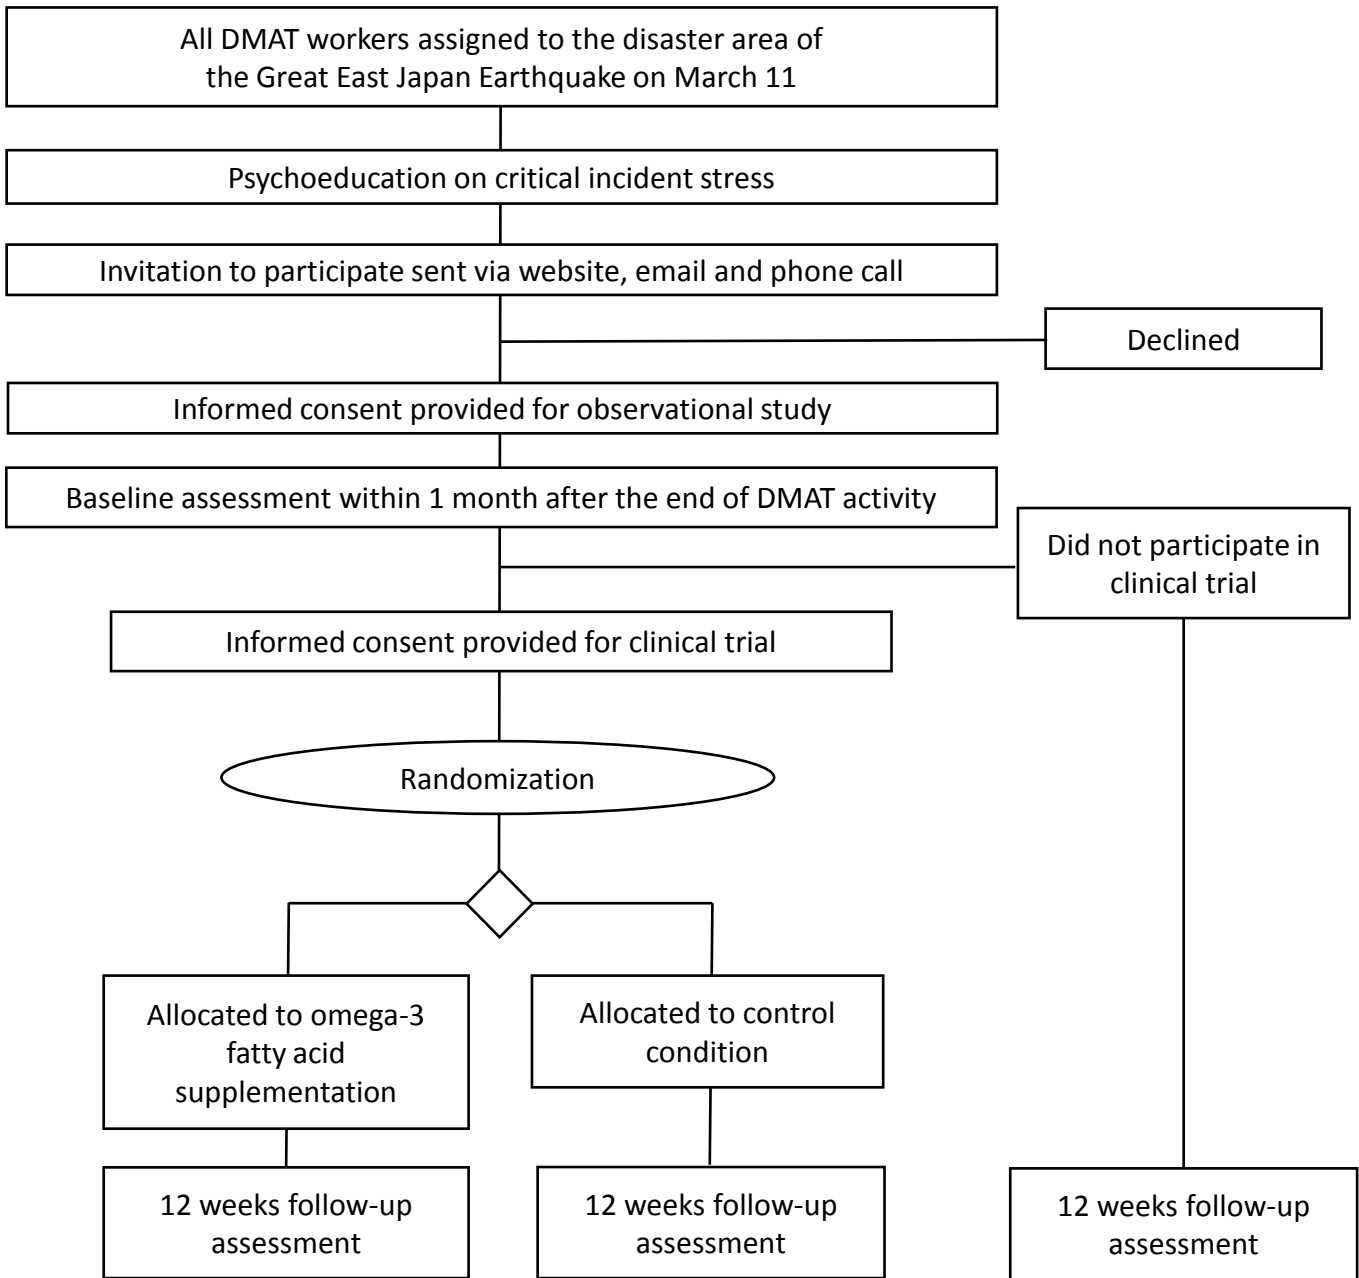

Supplement: MOESM1 [file 9478408]
